# Supplementary material for: Opening of the Outer Membrane Protein Channel in Tripartite Efflux Pumps Is Induced by Interaction with the Membrane Fusion Partner
Source: PubMed Central journal article supplement — J Biol Chem. 2010 Nov 29;286(7):5484–93. doi: 10.1074/jbc.M110.187658 (PMC3037662; doi:10.1074/jbc.m110.187658), 2010-11-29
Supplement: supp_M110.187658_jbc.M110.187658-1.pdf [file supp_M110.187658_jbc.M110.187658-1.pdf]

## Supplementary Information and Data

**TABLE 1: Strains and plasmids**

| <b>Strains/ plasmids</b>       | <b>Description</b>                                                                                                                                                                                 | <b>Source</b> |
|--------------------------------|----------------------------------------------------------------------------------------------------------------------------------------------------------------------------------------------------|---------------|
| <b><i>E. coli</i> strains</b>  |                                                                                                                                                                                                    |               |
| NovaBlue                       | Source of DNA for PCR amplification of <i>macAB</i> and <i>tolC</i> genes – <i>recA1 endA1 gyrA96 thi-1 hsdR17 supE44 relA1 lac</i> [F' <i>proAB lacIqZΔM15 Tn10(Tetr)</i> ]                       | Novagen       |
| C43(DE3)                       | Expression host for pET vectors - F- <i>ompT hsdSB (rB-mB-) gal dcm (DE3)</i>                                                                                                                      | <b>1</b>      |
| BL21(DE3)                      | F; <i>ompT, hsdSβ(rβ-mβ-), dcm, gal, (DE3) ton</i>                                                                                                                                                 | Stratagene    |
| KAM3(DE3)                      | Antibiotic sensitive host strain used for expression of pDuet vectors – <i>ΔacrB</i>                                                                                                               | <b>2</b>      |
| ( <i>ΔtolC</i> )TG1            | Antibiotic sensitive host strain used for expression of pDuet vectors – <i>ΔtolC</i>                                                                                                               | <b>3</b>      |
| ( <i>ΔtolC</i> )TG1(DE3)       | λDE3 lysogenic strain to enable T7 polymerase production for use with pET vectors                                                                                                                  | This study    |
| <b>Plasmid cloning vectors</b> |                                                                                                                                                                                                    |               |
| pET21a                         | Expression of His-tagged proteins in <i>E. coli</i>                                                                                                                                                | Novagen       |
| pACYCDuet                      | Simultaneous expression of two proteins in <i>E. coli</i>                                                                                                                                          | Novagen       |
| pGEX6p-3                       | Expression of GST-tagged proteins in <i>E. coli</i>                                                                                                                                                | GE Healthcare |
| <b>Plasmid constructs</b>      |                                                                                                                                                                                                    |               |
| pET-mtrD                       | <i>mtrD</i> cloned into pET21a(+) using NdeI-mtrD F and XhoI-mtrD R primers                                                                                                                        | This study    |
| pET-mtrE                       | <i>mtrE</i> cloned into pET21a(+) using NdeI-mtrE F and HindIII-mtrE R primers                                                                                                                     | This study    |
| pET-Δ34mtrC                    | <i>mtrC</i> mutant, encoding a derivative truncated at position 34, cloned into pET21a(+) using NdeI-Δ34-mtrC F and XhoI-mtrC R primers                                                            | This study    |
| pET-mtrC hairpin               | α-helical hairpin domain of <i>mtrC</i> cloned into pET21a(+) using NdeI-mtrC hairpin F and NdeI-mtrC hairpin R primers                                                                            | This study    |
| pACYCDuet-mtrD                 | <i>mtrD</i> cloned into MCS1 of pACYCDuet, using BamHI-mtrD F and HindIII-mtrD R primers.                                                                                                          | This study    |
| pACYCDuet-mtrC/mtrE            | <i>mtrC</i> cloned into MCS1 of pACYCDuet using BamHI-mtrC F, HindIII-mtrC R, <i>mtrE</i> cloned into MCS2 of pACYCDuet using NdeI-mtrE F, KpnI-mtrE R.                                            | This study    |
| pACYCDuet-mtrC/mtrD/mtrE       | <i>mtrCmtrE</i> cloned into MCS1 of pACYCDuet using BamHI-mtrC F, EcoRI-mtrC-SD-R, EcoRI-mtrE -ATG F and Sall-mtrE R; <i>mtrD</i> cloned into MCS2 of pACYCDuet using NdeI-mtrD F and KpnI-mtrD R. | This study    |
| pGEX6p-3-NT-mtrC-GST           | <i>NT-mtrC</i> cloned into pGEX6p-3 using MtrC NT For BamH1 and MtrC NT Rev Xho1 –GST-tag fusion                                                                                                   | This study    |
| pACYCDuet-mtrC-S               | <i>NT-mtrC</i> cloned into pACYC using MtrC NT For Nde1 and MtrC NT Rev Xho1 – S-tag fusion                                                                                                        | This study    |

**1.** Miroux B, Walker J. (1996) *J. Mol Biol.* **260**:289-98.

2. Morita Y, Kodama K, Shiota S, Mine T, Kataoka A, Mizushima T, Tsuchiya T. (1998) *Antimicrob Agents Chemother.* **42**:1778-82.
3. Nagakubo S, Nishino K, Hirata T, Yamaguchi A. (2002) *J Bacteriol.* **184**:4161-7.

**TABLE 2: Primers**

| <b>Primers</b>      |                                                         |
|---------------------|---------------------------------------------------------|
| NdeI-mtrD F         | <b>CATATG</b> GGCTAAATTCTTTATCGACCGCCCCATTTTCG          |
| XhoI-mtrD R         | <b>CTCGAG</b> ATATTGTTTATCGTCCGAACCGTTATACCCG           |
| BamHI-mtrD F        | <b>GGATCC</b> GGCTAAATTCTTTATCGACCGCCCCATTTTCG          |
| Sall-mtrD R         | <b>GTCGAC</b> ATATTGTTTATCGTCCGAACCGTTATACCCG           |
| KpnI-mtrD R         | <b>GGTACC</b> ATATTGTTTATCGTCCGAACCG                    |
| NdeI-mtrC F         | <b>CATATG</b> GGCTTTTTTATGCTTCTAAGGCGATGCGTGCG          |
| XhoI-mtrC R         | <b>CTCGAG</b> TTTCGCTTCAGAAGCAGGTTTGGCTTCAG             |
| BamHI-mtrC F        | <b>GGATCC</b> GGCTTTTTTATGCTTCTAAGGCGATGCGTGCG          |
| Sall-mtrC R         | <b>GTCGAC</b> TTTCGCTTCAGAAGCAGGTTTGGCTTCAG             |
| NdeIΔ34-mtrC F      | <b>CATATG</b> GGCGGGCAGCCTGCGGGTCCG                     |
| NdeI-mtrC hairpin F | <b>CATATG</b> ATCGACAGTTCACCTTATGAAGC                   |
| XhoI-mtrC hairpin R | <b>CTCGAG</b> AATGCGCGAACGGTTCAGATTG                    |
| NdeI-mtrE F         | <b>CATATG</b> AATACTACATTGAAAACCTACCTTGACCTCTGTTG       |
| HindIII-mtrE R      | <b>AAGCTT</b> TTTGCCGTTTGGGTATCCCGTTTCAATCCGC           |
| BamHI-mtrE F        | <b>GGATCC</b> GAATACTACATTGAAAACCTACCTTG                |
| KpnI-mtrE R         | <b>GGTACC</b> TTTGCCGTTTGGGTATCCCGTTTCAATCCGC           |
| EcoRI-mtrC SD R     | <b>GAATTC</b> TAATAATTCTCTTATTTTCGCTTCAGAAGCAGG         |
| EcoRI-mtrE ATG F    | <b>GAATTC</b> ATGAATACTACATTGAAAACCT                    |
| NcoI-mtrC hairpin F | <b>CCATGG</b> AGATCGACAGTTCACCTTATGAAGG                 |
| MtrC NT For BamH1   | <b>GGATCC</b> GGCGGGCAGCCTGCGGGTCCGGAA                  |
| MtrC NT Rev Xho1    | <b>CTCGAG</b> TTATTTTCGCTTCAGAAGCAGGTTTGGCTTCAGATGCCGTC |
| MtrC NT For Nde1    | <b>CATATG</b> GGCGGGCAGCCTGCGGGTCCGGAA                  |
| MtrC NT Rev Xho1    | <b>CTCGAG</b> TTTCGCTTCAGAAGCAGGTTTGGCTTCAGATGCCGTC     |

**Notes:** Bolded sequences indicate restriction endonuclease sites. Underlined sequences indicate start and stop codons.

**TABLE 3: Primers used for mutagenesis of *mtrE***

| <b>MtrE Derivatives</b> | <b>Primers</b>                                                                             |
|-------------------------|--------------------------------------------------------------------------------------------|
| N198L                   | For 5' CGCGCGAGGAAACCTACCTAGCTGTCCGAATTG 3'<br>Rev 5' CAATTCGGACAGCTAGGTAGGTTTCTCGCGCG 3'  |
| R239E                   | For 5' CCGCGAACAGGCGGAGAATGCCTTGGCAAC 3'<br>Rev 5' GTTGCCAAGGCATTCTCCGCCTGTTTCGCGG 3'      |
| K397E                   | For 5' CTATGACGCTTTAAGCGAGCAAAGCCGCGCCTC 3'<br>Rev 5' GAGGCGCGGCTTTGCTCGCTTAAAGCGTCATAG 3' |
| Q441E                   | For 5' GGCTTTGTTCGGCAGAGCTGACCCGCGCCG 3'<br>Rev 5' CGGCGCGGGTCAGCTCTGCCGACAAAGCC 3'        |
| E434K                   | For 5' GCAGCTATTCGGCGAAAGGTGCGGCTTTG 3'<br>Rev 5' CAAAGCCGCACCTTTTCGCCGAATAGCTGC 3'        |

# Figure 1

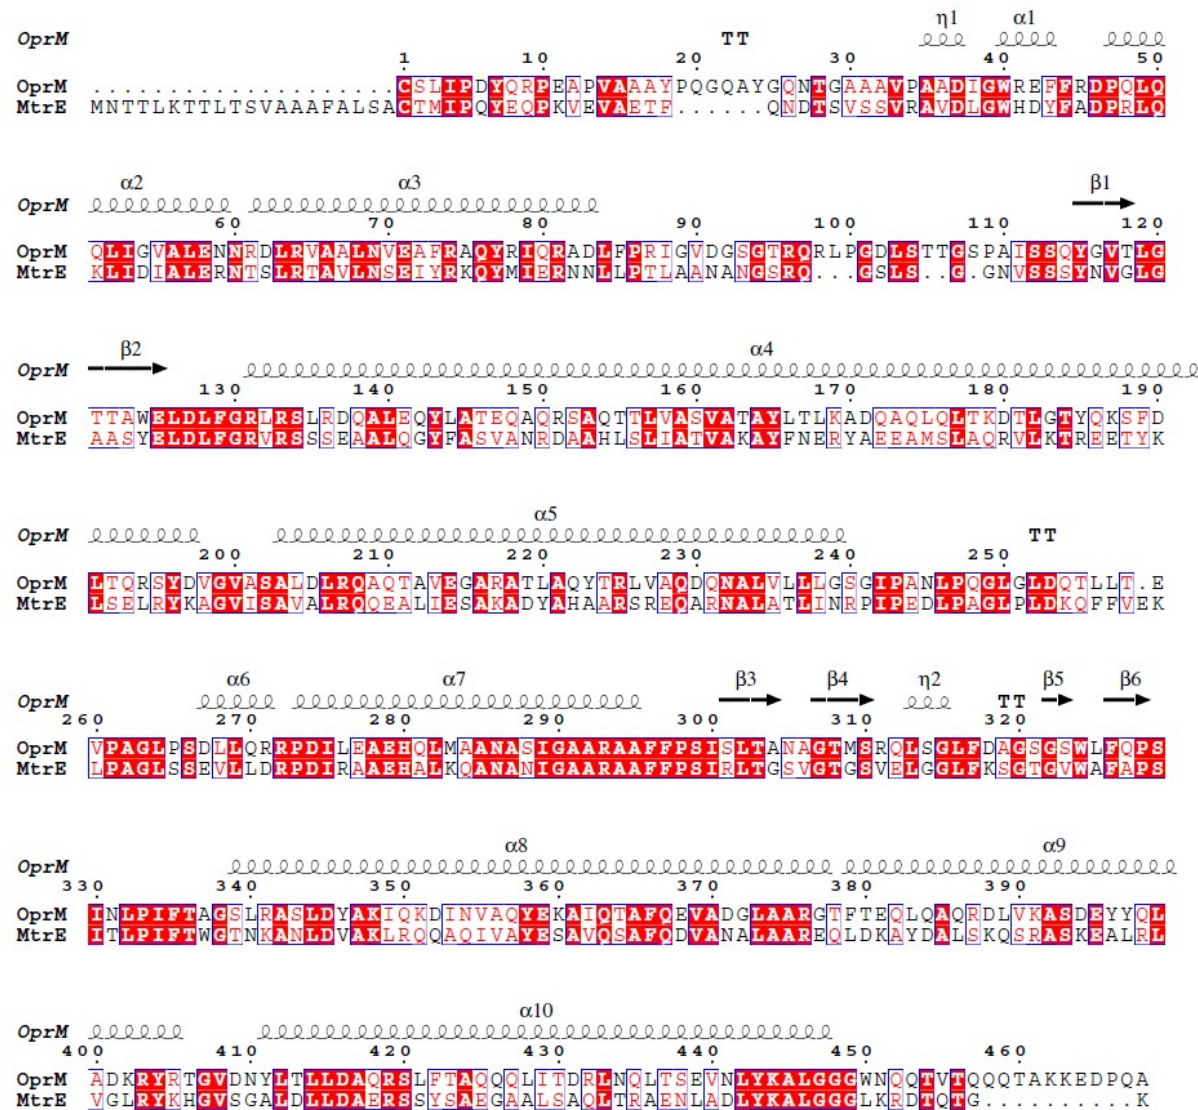

A structural alignment of MtrE and OprM indicating the identical and homologous residues as well as the secondary structure elements in OprM as determined by X-ray crystallography.

## Figure 2

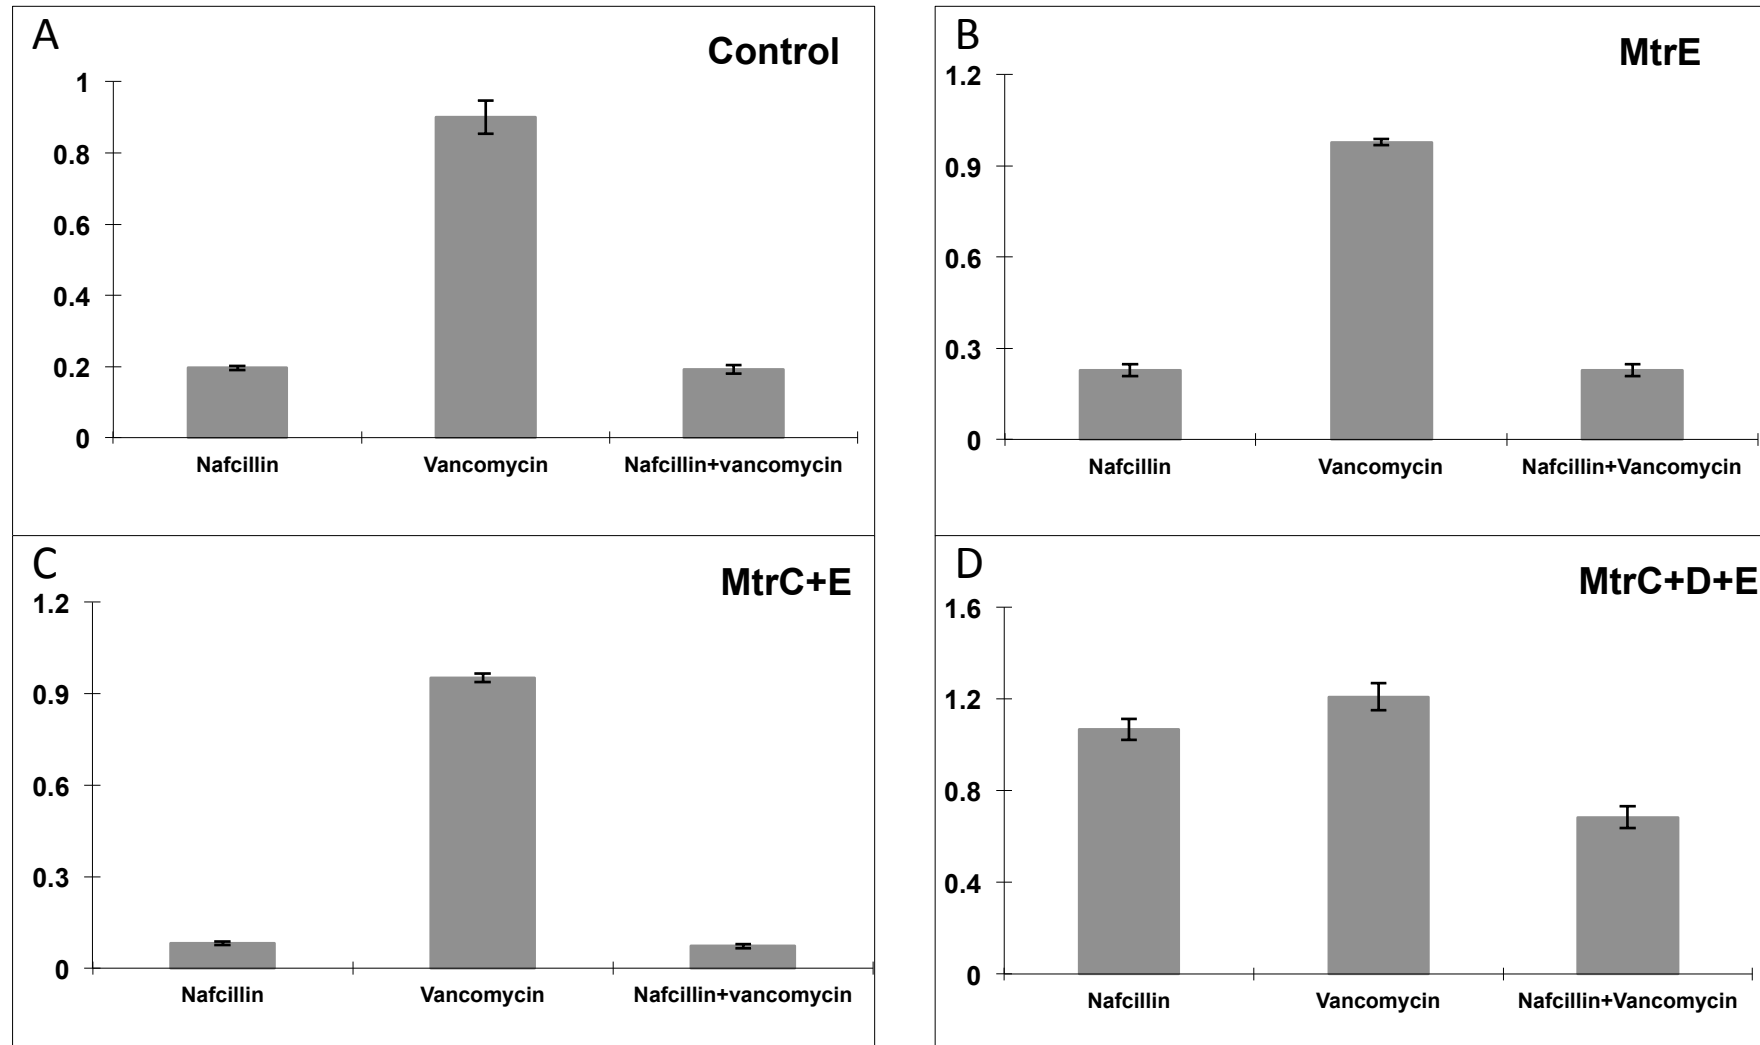

**Drug-induced opening of the MtrE channel.** A bar chart showing the extent of inhibition of the growth of *E. coli* cells in response to 64  $\mu\text{g/ml}$  nafcillin or/and 150  $\mu\text{g/ml}$  vancomycin, of strain KAM3(DE3), harboring the plasmids (A) pACYC, (B) pACYC-MtrE, (C) pACYC-MtrCE and (D) pACYC-MtrCDE, as indicated. For each strain the  $\text{OD}_{600}$  was determined after growth for 24 hours in the absence and presence of nafcillin and/or vancomycin and the growth inhibition was determined as the ratio of these measurements made in triplicate. In comparison to the control strain transformed with pACYC, the strains expressing MtrCDE, but not MtrE or MtrCE, were resistant to nafcillin and susceptible to vancomycin in the presence, but not the absence, of nafcillin. This data suggests that the the MtrD-nafcillin complex is required to trigger opening of the MtrE channel that enables vancomycin to enter the cells.

### Figure 3

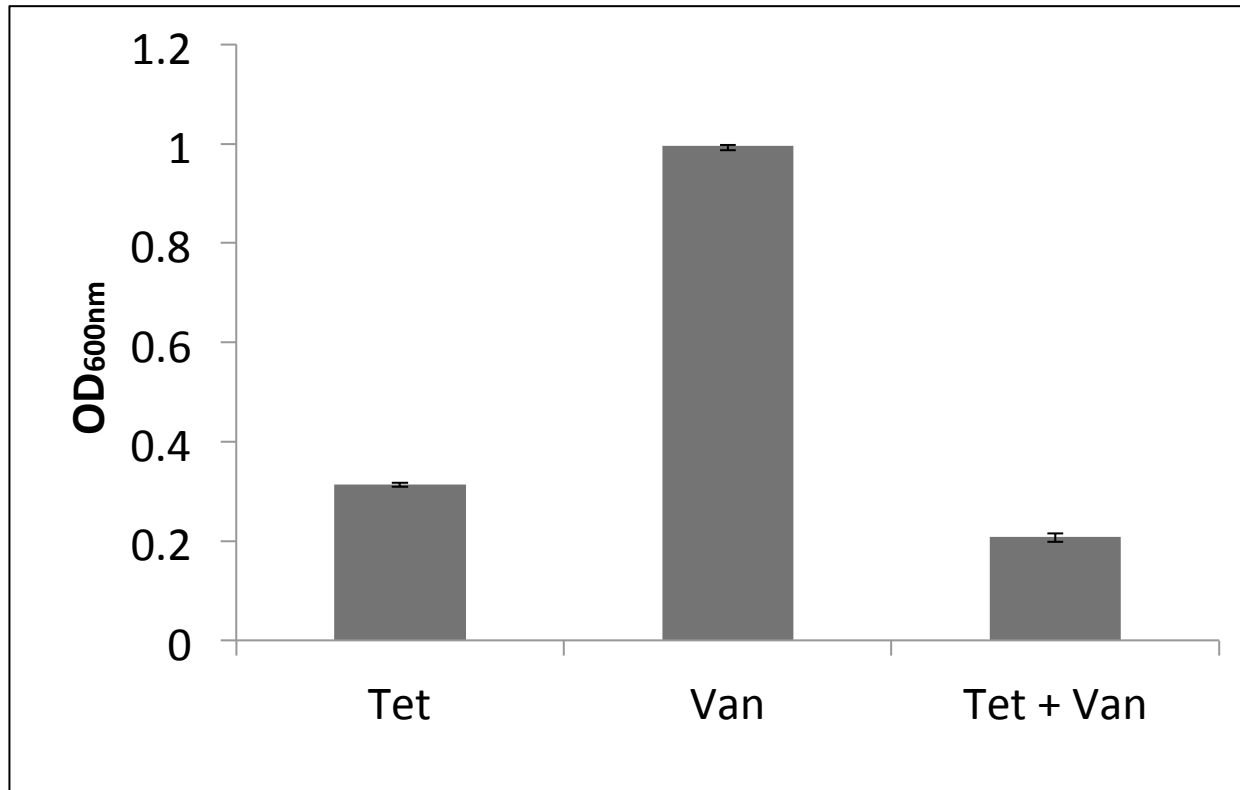

**The binding of tetracycline to MtrD triggers opening of the MtrE channel.** A bar chart showing the extent of inhibition of the growth of *E. coli* cells in response to 3  $\mu\text{g/ml}$  tetracycline or/and 150  $\mu\text{g/ml}$  vancomycin, of strain  $\Delta\text{tolC}$  TG1(DE3), harboring the plasmid pACYC-MtrCDE. For each strain the OD<sub>600</sub> was determined after growth for 24 hours in the absence and presence of tetracycline and/or vancomycin and the growth inhibition was determined as the ratio of these measurements made in triplicate. The cells are clearly insensitive to vancomycin, indicating that the MtrE channel is closed within the MtrCDE assembly. There is a small, but reproducible, further decrease in the growth of cells treated with both tetracycline and vancomycin, compared to those treated solely with tetracycline. This data suggests that the MtrD-tetracycline complex is required to trigger opening of the MtrE channel that enables vancomycin to enter cells.

## Figure 4

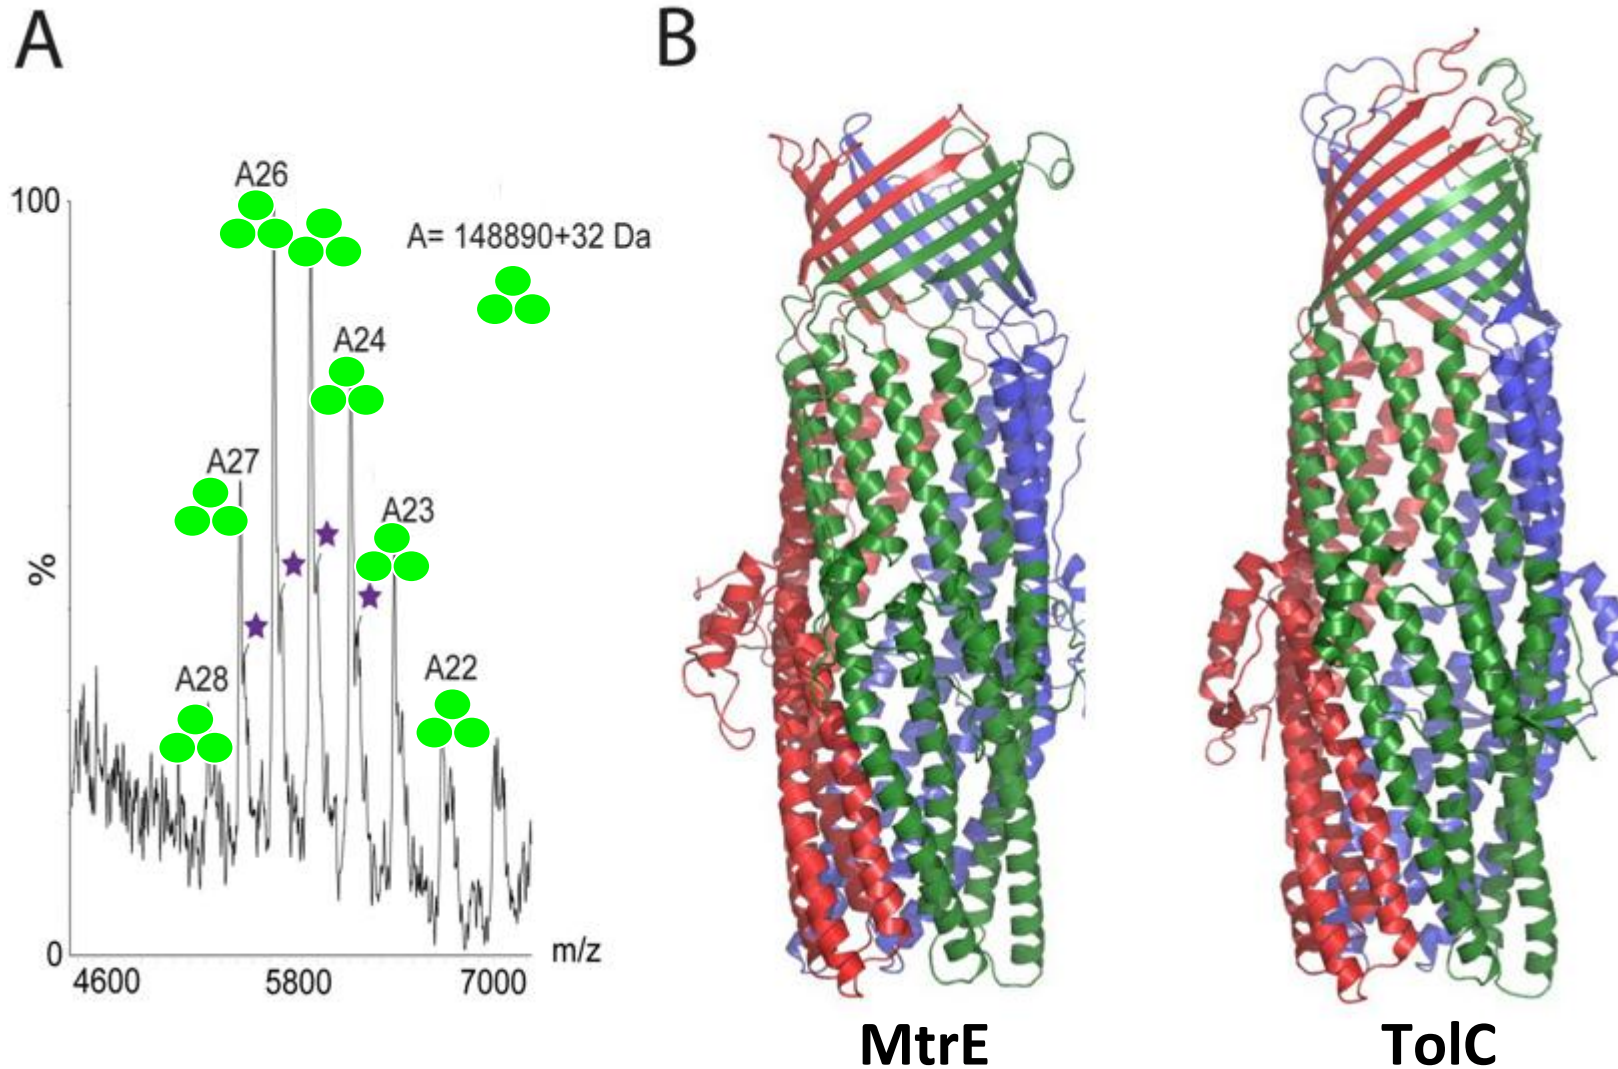

**A molecular model for trimeric MtrE. (A)** Mass spectrum of trimeric MtrE. The charge states and measured mass of the trimer is illustrated. The asterisk indicates that a small molecule is bound to the protein complex, likely corresponding to a lipid.

**(B)** Comparison of the homology model generated for MtrE with the crystallographic structure of TolC.
